# Supplementary material for: Expression of miR-296-5p as predictive marker for radiotherapy resistance in early-stage laryngeal carcinoma
Source: J Transl Med. 2015 Aug 12;13:262. doi: 10.1186/s12967-015-0621-y (PMC4533949; doi:10.1186/s12967-015-0621-y)
Supplement: Additional file 1: — Table S1. Raw data of the expression level of 667 human microRNAs in LSCC samples according to the TaqMan Human MicroRNA Array assays. [file 12967_2015_621_MOESM1_ESM.xlsx]

## Sheet: Sheet1
Supplementary Table S1 – Raw data of the expression level of 667 human microRNAs in LSCC samples according to the TaqMan Human MicroRNA Array assays.
Assay	1radiosensivity (CT)	2radiosensivity (CT)	3radiosensivity (CT)	4radiosensivity (CT)	5radioresistant (CT)	6radioresistant (CT)	7radioresistant (CT)	8radioresistant (CT)	9radioresistant (CT)
ath-miR159a-4373390	36	36	36	36	36	36	36	36	36
has-miR-155-4395459	26.8554	25.9291	26.9637	26.7464	27.6877	26.8749	29.0275	22.9827	28.2317
hsa-let-7a-4373169	28.923	25.6294	26.9335	25.5989	26.0869	27.526	31.6249	22.5996	28.1488
hsa-let-7b-4395446	25.2727	23.5183	23.2569	23.1912	23.671	24.6158	24.144	21.4372	25.79
hsa-let-7c-4373167	27.8264	27.3064	26.7266	25.0373	26.1574	27.992	28.23	23.5306	28.6225
hsa-let-7d-4395394	27.4634	26.1037	27.6694	27.1535	26.1978	26.8894	28.4152	23.046	27.4415
hsa-let-7e-4395517	24.7862	22.7305	23.8964	22.3029	22.9704	23.7832	25.9371	19.9684	24.3146
hsa-let-7f-4373164	36	30.474	36	28.4559	31.3327	28.8424	36	26.824	36
hsa-let-7g-4395393	27.7899	26.219	27.766	25.6983	26.7371	27.4124	29.7669	23.3546	25.7657
hsa-miR-1-4395333	36	35.005	36	36	36	36	36	36	36
hsa-miR-100-4373160	26.047	27.1528	25.0458	23.1408	25.4442	26.3199	32.8029	23.6585	27.9147
hsa-miR-101-4395364	31.6096	30.5571	31.2715	34.9294	30.1873	30.5924	34.7207	29.1617	32.6298
hsa-miR-103-4373158	29.3066	27.8618	27.9899	27.1821	28.0208	28.2393	30.227	23.107	28.7974
hsa-miR-105-4395278	36	36	36	36	36	36	35.552	28.0987	36
hsa-miR-106a-4395280	25.0386	23.5077	23.2827	22.9221	23.9883	23.6444	27.5666	18.6762	24.7145
hsa-miR-106b-4373155	26.6094	25.084	25.4443	24.9909	25.3584	26.5267	29.6003	21.8425	27.592
hsa-miR-107-4373154	36	36	36	33.2063	31.9984	35.9264	34.5071	28.772	33.9098
hsa-miR-10a-4373153	29.8366	28.3558	29.183	27.4436	29.5378	29.0712	31.3455	26.1933	31.7627
hsa-miR-10b-4395329	36	32.7741	29.901	28.2455	30.0362	35.3385	36	24.5598	34.6377
hsa-miR-122-4395356	36	36	36	36	34.0265	36	36	36	36
hsa-miR-124-4373295	36	36	33.9928	36	36	36	33.6062	29.2926	34.4513
hsa-miR-125a-3p-4395310	32.914	31.2296	30.888	30.789	32.2262	31.9961	32.9447	28.0386	33.8699
hsa-miR-125a-5p-4395309	30.9135	29.6148	28.7854	29.111	29.4927	31.1203	30.3783	25.1951	29.8828
hsa-miR-125b-4373148	25.9999	26.502	24.148	23.6523	24.9176	26.058	27.8059	22.5302	26.9387
hsa-miR-126-4395339	24.4023	24.2106	23.1992	22.8651	23.469	23.8193	26.948	21.0056	24.4072
hsa-miR-127-3p-4373147	29.2948	30.5546	24.7574	24.3494	28.9998	29.0558	30.8734	23.8495	30.2658
hsa-miR-127-5p-4395340	36	36	36	33.1398	36	36	36	36	36
hsa-miR-128-4395327	33.6748	31.3141	34.9084	30.9855	30.5867	34.2158	32.3552	27.5225	34.9261
hsa-miR-129-3p-4373297	36	36	36	36	36	36	36	25.1382	36
hsa-miR-129-5p-4373171	36	36	36	36	36	36	36	31.6267	36
hsa-miR-130a-4373145	31.4976	29.9662	28.642	27.1585	29.0051	29.2413	32.4916	25.1552	30.6869
hsa-miR-130b-4373144	30.4693	29.9209	28.8908	28.6671	29.5438	29.9356	33.3938	25.0408	32.1976
hsa-miR-132-4373143	29.3394	27.4304	25.5184	24.9655	27.0268	27.4719	32.9091	24.139	28.4551
hsa-miR-133a-4395357	34.8337	36	32.0024	31.6414	32.7414	32.009	33.0206	32.3401	36
hsa-miR-133b-4395358	36	36	35.2061	36	36	36	36	36	36
hsa-miR-134-4373299	36	36	32.8488	33.4748	36	36	36	36	36
hsa-miR-135a-4373140	36	32.7471	36	33.1974	33.4908	33.4286	36	28.4024	33.0032
hsa-miR-135b-4395372	27.9126	26.3904	28.5672	28.1567	26.8314	27.7689	30.3209	21.9887	28.3509
hsa-miR-136-4373173	36	36	36	36	36	36	36	36	36
hsa-miR-137-4373301	36	36	36	36	33.6599	36	34.2484	36	36
hsa-miR-138-4395395	30.9617	30.0065	29.4002	30.7305	30.5682	28.2644	28.9557	24.9777	29.6953
hsa-miR-139-3p-4395424	36	36	36	36	36	36	36	36	36
hsa-miR-139-5p-4395400	29.2439	30.3781	29.2786	29.5585	28.4505	28.8977	31.5704	27.0037	30.0269
hsa-miR-140-3p-4395345	33.4043	33.9599	34.1561	33.5741	35.658	35.103	35.1908	31.6005	35.0387
hsa-miR-140-5p-4373374	28.5946	28.3101	26.076	26.0446	28.6516	28.0318	33.1252	25.7325	28.6282
hsa-miR-141-4373137	27.4822	25.8135	31.2079	30.9281	26.0318	27.4407	29.4853	23.7659	28.1523
hsa-miR-142-3p-4373136	25.5769	24.2035	26.4826	26.241	26.6278	25.0918	29.4845	23.3173	25.8331
hsa-miR-142-5p-4395359	30.552	28.6986	31.2542	30.4791	30.3405	29.7425	32.8749	28.4389	31.3095
hsa-miR-143-4395360	27.6937	28.4232	27.3064	26.5954	27.37	27.9432	31.4583	25.6416	28.0658
hsa-miR-145-4395389	24.8141	25.8545	24.692	24.1529	24.2125	24.973	25.9204	21.1355	25.2184
hsa-miR-146a-4373132	24.2987	23.2658	25.4857	25.2364	24.4625	23.6628	26.9915	18.6201	24.421
hsa-miR-146b-3p-4395472	36	34.2448	31.9718	31.0263	32.809	36	36	31.1057	36
hsa-miR-146b-5p-4373178	25.9698	24.3592	23.874	23.6446	25.4476	25.3814	27.8798	22.8772	25.7838
hsa-miR-147-4373131	36	36	36	36	36	33.4496	36	36	36
hsa-miR-147b-4395373	36	34.4164	36	36	36	34.1388	36	34.8996	36
hsa-miR-148a-4373130	28.8961	28.4521	27.5974	27.331	27.8226	28.0197	32.5837	25.8986	28.3163
hsa-miR-148b-4373129	33.8555	36	33.7317	34.3464	33.0405	34.9858	36	30.2915	36
hsa-miR-149-4395366	29.5271	28.0663	28.6477	28.0675	29.5824	28.2399	29.7514	22.1342	29.5633
hsa-miR-150-4373127	23.1119	23.8479	25.2181	24.8167	24.7776	23.4184	28.1831	20.6621	24.5412
hsa-miR-152-4395170	28.875	27.7681	27.9921	27.078	27.5618	28.234	32.3354	25.9572	29.1094
hsa-miR-153-4373305	36	36	36	36	36	36	36	36	36
hsa-miR-154-4373270	36	36	36	36	36	36	36	36	36
hsa-miR-15a-4373123	33.0839	31.1394	32.4291	30.9442	33.5649	36	36	29.4758	33.4055
hsa-miR-15b-4373122	28.3615	25.3233	27.0562	25.5772	26.3853	26.36	31.9325	21.8672	26.6946
hsa-miR-16-4373121	24.8007	23.301	24.7277	23.5983	23.8789	22.1003	26.2222	19.9681	24.567
hsa-miR-17-4395419	24.9193	23.1128	24.6195	22.82	23.9509	23.4575	27.6081	18.3939	24.4505
hsa-miR-181a-4373117	29.3634	29.3533	29.1579	28.0112	29.1509	29.4948	35.7115	24.9882	30.0973
hsa-miR-181c-4373115	36	34.2333	33.348	33.2134	33.0793	32.3386	36	29.7603	35.4303
hsa-miR-182-4395445	33.7429	33.5881	35.5558	36	36	35.8844	36	31.3905	36
hsa-miR-183-4395380	35.3981	36	36	34.7913	32.6635	32.2576	35.3943	29.838	36
hsa-miR-184-4373113	32.1475	36	36	36	36	36	36	27.9625	36
hsa-miR-185-4395382	31.2666	30.2501	31.1551	30.8988	30.0287	31.3834	34.2418	28.2905	32.3885
hsa-miR-186-4395396	28.0922	27.5759	27.8412	27.7175	26.5022	28.1347	31.3108	23.7163	28.0898
hsa-miR-187-4373307	36	36	32.7027	31.0894	32.4656	36	36	27.996	36
hsa-miR-188-3p-4395217	36	36	36	36	36	36	36	36	36
hsa-miR-18a-4395533	31.2813	29.8723	30.4459	28.337	30.7702	28.6501	36	24.6014	28.7496
hsa-miR-18b-4395328	36	36	36	36	36	36	36	28.8768	36
hsa-miR-190-4373110	36	36	33.4655	36	33.7282	33.1822	36	32.4366	36
hsa-miR-191-4395410	26.3871	24.9908	25.4048	25.3663	24.4014	25.6139	25.8866	21.5635	26.6161
hsa-miR-192-4373108	30.7715	30.3206	32.3582	30.5265	29.8975	31.9559	36	27.4357	30.8704
hsa-miR-193a-3p-4395361	36	36	36	36	36	36	36	35.5254	36
hsa-miR-193a-5p-4395392	32.1218	28.8758	27.7203	27.5536	28.0777	29.1467	27.134	24.4379	30.516
hsa-miR-193b-4395478	26.1203	25.3872	25.7423	25.6682	25.2762	25.038	24.3038	22.0362	24.9576
hsa-miR-194-4373106	31.9813	32.2373	31.8052	31.0888	29.7047	32.6085	36	27.8825	32.9981
hsa-miR-195-4373105	28.0075	28.3677	28.1283	27.7054	27.1726	27.7349	36	24.272	28.9157
hsa-miR-196b-4395326	32.3729	30.4535	29.0141	29.1367	29.0868	29.6784	36	25.7504	30.6235
hsa-miR-197-4373102	30.0431	28.7691	27.7388	28.5061	27.6756	29.1327	31.4459	25.6687	29.3866
hsa-miR-198-4395384	36	36	29.9048	31.4882	32.3742	32.5601	36	30.7307	36
hsa-miR-199a-3p-4395415	26.4919	27.7394	24.6426	24.1156	26.5158	26.0692	29.5124	24.2748	26.834
hsa-miR-199a-5p-4373272	33.491	36	31.3149	29.9718	33.3666	31.613	36	31.4496	34.6378
hsa-miR-199b-5p-4373100	36	33.6043	36	32.0501	33.4572	35.5405	36	32.3326	36
hsa-miR-19a-4373099	30.243	27.7612	29.6305	27.6347	28.2752	28.6016	33.5989	24.4629	29.1827
hsa-miR-19b-4373098	25.317	23.3783	24.8548	23.2908	24.5383	23.6884	27.2748	19.3228	24.5538
hsa-miR-200a-4378069	29.2032	25.6904	36	33.2276	25.618	27.2085	36	23.174	28.2113
hsa-miR-200b-4395362	27.8586	24.709	32.0081	30.8162	25.0872	26.5684	26.4915	21.5146	26.6581
hsa-miR-200c-4395411	26.1852	23.1446	30.3042	29.4999	24.0549	24.583	24.1272	19.6535	25.8032
hsa-miR-202-4395474	32.038	32.7478	32.711	31.0462	32.0863	32.845	36	31.7853	33.563
hsa-miR-203-4373095	24.636	22.5764	28.1362	27.2132	22.4836	22.5753	24.4704	21.1571	22.5709
hsa-miR-204-4373094	31.5181	31.1142	33.7614	31.6487	30.4192	36	36	23.9495	36
hsa-miR-205-4373093	24.0969	22.7508	27.0868	26.2237	22.3951	24.5186	24.018	19.1045	25.1617
hsa-miR-208-4373091	36	36	36	36	36	36	36	36	36
hsa-miR-208b-4395401	36	36	36	36	36	36	36	36	36
hsa-miR-20a-4373286	25.9663	23.9323	24.9796	23.3333	24.9002	24.45	29.0441	19.153	24.9646
hsa-miR-20b-4373263	29.597	27.6095	28.8371	27.6012	28.3595	27.5513	31.1652	22.5283	29.5287
hsa-miR-21-4373090	24.3909	22.0885	23.5747	21.4961	22.651	23.6179	27.2555	21.0083	23.7751
hsa-miR-210-4373089	36	27.9348	29.7035	28.5405	29.3399	36	31.0886	24.599	31.3366
hsa-miR-211-4373088	36	36	36	36	36	36	36	36	36
hsa-miR-212-4373087	31.2664	32.2254	29.739	29.0827	30.9497	32.7476	36	28.3226	32.3115
hsa-miR-214-4395417	28.5985	30.1074	24.5151	24.4748	27.8983	28.3445	31.0726	25.0498	28.4785
hsa-miR-215-4373084	36	36	36	36	36	36	36	33.0586	36
hsa-miR-216a-4395331	36	36	36	36	36	36	36	36	36
hsa-miR-216b-4395437	36	36	36	36	36	36	36	34.3521	36
hsa-miR-217-4395448	36	36	36	36	36	36	36	36	36
hsa-miR-218-4373081	27.5634	30.4335	26.1112	25.4021	29.1936	28.9688	34.3434	25.9002	31.4313
hsa-miR-219-1-3p-4395206	36	36	36	36	36	36	36	36	36
hsa-miR-219-2-3p-4395501	36	36	36	36	36	36	36	36	36
hsa-miR-219-5p-4373080	36	36	36	36	36	36	36	36	36
hsa-miR-22-4373079	36	36	36	29.0374	28.7589	29.2241	36	28.2663	36
hsa-miR-220-4373078	36	36	36	36	36	36	36	36	36
hsa-miR-220b-4395317	36	36	36	36	36	36	36	36	36
hsa-miR-220c-4395322	36	36	36	36	36	36	36	36	36
hsa-miR-221-4373077	28.3094	27.9149	29.6118	28.4856	28.1766	27.2389	27.9566	23.7675	28.898
hsa-miR-222-4395387	22.5494	21.5396	23.8424	23.7424	20.5001	22.5483	30.1326	19.2684	23.9372
hsa-miR-223-4395406	24.1198	21.4048	22.4445	22.0162	21.9944	22.059	24.5438	19.0015	23.4949
hsa-miR-224-4395210	26.6286	24.9001	28.449	27.6274	24.5976	26.5041	25.6121	22.1289	26.3362
hsa-miR-23a-4373074	36	36	36	36	30.95	36	36	30.5355	33.7784
hsa-miR-23b-4373073	36	36	36	32.9958	36	32.3917	36	26.5525	36
hsa-miR-24-4373072	22.653	21.7376	23.743	22.38	20.8254	23.295	24.054	18.0683	22.7705
hsa-miR-25-4373071	28.5678	26.0511	27.3541	25.4503	26.484	27.4863	31.4292	22.6798	28.2182
hsa-miR-26a-4395166	25.7986	24.7794	26.6352	24.4403	24.774	25.407	30.2159	21.3249	26.3526
hsa-miR-26b-4395167	27.9823	26.9861	29.9716	27.7441	26.243	27.6526	34.1184	24.2633	28.2017
hsa-miR-27a-4373287	25.4709	24.4144	26.8579	24.9964	23.7877	25.952	27.4033	22.0399	25.5758
hsa-miR-27b-4373068	27.071	26.0102	27.8871	25.8031	26.7712	26.6887	28.2483	23.1547	26.812
hsa-miR-28-3p-4395557	28.7889	27.1524	29.6556	27.3687	27.1454	29.1339	31.9606	23.6879	29.2896
hsa-miR-28-5p-4373067	30.4617	27.8099	30.5218	27.8523	28.0813	28.8909	30.4233	23.9528	29.941
hsa-miR-296-3p-4395212	36	36	36	36	36	36	36	34.6232	36
hsa-miR-296-5p-4373066	34.5291	34.1711	35.1581	35.2733	34.1401	32.2566	36	26.6049	32.6986
hsa-miR-298-4395301	36	36	36	36	36	36	36	36	36
hsa-miR-299-3p-4373189	36	36	36	36	36	36	36	36	36
hsa-miR-299-5p-4373188	36	36	36	36	36	36	36	36	36
hsa-miR-29a-4395223	25.2204	25.2303	26.7905	25.1435	25.0447	25.213	27.8683	23.4978	25.8852
hsa-miR-29b-4373288	29.5821	30.6878	32.1894	30.2797	29.6551	30.2967	34.7138	29.5014	30.8625
hsa-miR-29c-4395171	28.8625	29.4563	31.8364	29.3866	28.7633	30.6198	36	27.1156	30.9568
hsa-miR-301a-4373064	32.4084	30.742	30.5562	30.9767	32.3105	30.5001	33.697	26.2994	32.0369
hsa-miR-301b-4395503	34.9979	33.1134	32.3257	32.6489	36	32.2491	36	29.1431	33.3368
hsa-miR-302a-4378070	36	36	36	34.5712	36	36	36	36	36
hsa-miR-302b-4378071	36	36	34.582	34.6813	36	36	36	36	36
hsa-miR-302c-4378072	33.889	36	35.033	36	36	36	36	36	36
hsa-miR-30b-4373290	24.642	23.9938	26.2111	24.4997	23.4358	24.8601	27.4982	20.7827	25.5405
hsa-miR-30c-4373060	24.3039	23.7864	25.8963	23.831	23.307	24.39	27.1935	20.4454	24.8638
hsa-miR-31-4395390	28.8568	22.9877	22.169	20.5572	21.992	23.5504	23.4803	20.3872	24.0826
hsa-miR-32-4395220	34.9029	33.2367	36	33.8506	33.2004	32.0652	36	30.8289	36
hsa-miR-320-4395388	25.8825	24.1185	24.3123	24.8369	24.7934	24.8359	24.2204	20.5157	26.5008
hsa-miR-323-3p-4395338	33.0614	32.3816	30.8677	29.17	31.5062	31.5655	34.4129	29.4223	32.541
hsa-miR-324-3p-4395272	30.9843	29.662	29.195	28.8442	29.7242	30.7532	30.6496	26.0636	30.762
hsa-miR-324-5p-4373052	30.7954	30.4313	29.3316	28.6206	29.1185	29.9403	31.2885	25.0747	30.7456
hsa-miR-325-4373051	36	36	36	36	36	36	36	36	36
hsa-miR-326-4373050	36	36	36	36	36	36	36	36	36
hsa-miR-328-4373049	28.5145	28.6438	27.4334	27.3285	27.869	28.7281	34.431	24.3968	29.6465
hsa-miR-329-4373191	36	36	34.9478	34.9358	36	36	36	36	36
hsa-miR-330-3p-4373047	36	36	36	36	36	35.665	36	31.9004	36
hsa-miR-330-5p-4395341	36	36	36	36	36	36	36	36	36
hsa-miR-331-3p-4373046	27.7747	26.4141	27.1268	27.119	25.7419	26.7229	28.3321	22.0563	27.4262
hsa-miR-331-5p-4395344	34.5115	36	36	36	36	36	36	31.8744	36
hsa-miR-335-4373045	31.7893	32.0531	30.401	31.7671	30.3652	30.3466	33.3803	27.1306	32.6656
hsa-miR-337-5p-4395267	31.8736	36	30.339	29.9804	34.4724	36	34.9704	30.1681	36
hsa-miR-338-3p-4395363	36	33.2515	32.3555	35.6308	33.9597	36	36	31.6204	36
hsa-miR-339-3p-4395295	36	30.7285	29.9018	30.5335	30.8281	31.0866	32.8921	26.5692	34.5412
hsa-miR-339-5p-4395368	36	36	32.0064	31.3185	36	36	36	27.313	36
hsa-miR-33b-4395196	36	36	36	36	36	36	36	36	36
hsa-miR-340-4395369	30.5582	29.9069	29.1833	29.3027	29.2337	30.9789	36	26.6844	31.4066
hsa-miR-342-3p-4395371	26.8044	24.8438	25.8907	25.79	25.2109	25.7982	27.2199	21.7182	27.0605
hsa-miR-342-5p-4395258	36	36	36	36	36	36	36	31.1972	36
hsa-miR-345-4395297	28.906	27.6604	26.5471	26.5341	28.8046	28.8994	31.2219	23.9348	30.3199
hsa-miR-346-4373038	36	36	36	36	36	36	36	36	36
hsa-miR-34a-4395168	26.5217	25.7429	27.1521	25.0887	25.8774	26.8694	29.5188	23.5574	27.4339
hsa-miR-34c-5p-4373036	32.5599	30.0425	33.4348	31.2315	30.5833	32.4021	36	31.3599	32.2943
hsa-miR-361-5p-4373035	32.8392	32.2223	30.1107	30.4822	32.3587	32.8763	36	26.8796	36
hsa-miR-362-3p-4395228	36	32.9325	34.9935	36	32.3342	33.43	33.98	35.8892	34.1922
hsa-miR-362-5p-4378092	36	30.9583	34.258	31.731	33.8863	32.6882	33.4605	29.8252	33.1044
hsa-miR-363-4378090	33.6534	36	34.5723	33.2957	35.7355	36	36	29.0403	36
hsa-miR-365-4373194	29.2766	28.3341	28.1711	27.3869	27.5136	28.6982	27.5925	24.0764	28.4167
hsa-miR-367-4373034	36	36	36	36	36	36	36	36	36
hsa-miR-369-3p-4373032	36	36	36	36	36	36	36	36	36
hsa-miR-369-5p-4373195	36	36	36	36	36	36	36	36	36
hsa-miR-370-4395386	36	36	27.427	27.3131	35.2951	36	36	28.1905	36
hsa-miR-371-3p-4395235	36	36	36	36	36	36	36	36	36
hsa-miR-372-4373029	36	36	33.8912	35.3812	36	36	36	33.7174	36
hsa-miR-373-4378073	36	36	36	36	36	36	36	36	36
hsa-miR-374a-4373028	27.9164	27.6927	28.3586	28.4923	27.162	28.1366	32.6341	24.9945	29.1287
hsa-miR-374b-4381045	28.4099	27.176	27.4301	27.0087	26.1164	27.9078	33.1897	23.657	27.9833
hsa-miR-375-4373027	29.9842	28.0567	32.581	30.8809	27.4089	31.2696	33.7762	26.7604	31.7854
hsa-miR-376a-4373026	32.321	35.1389	29.318	29.1581	30.9999	32.7941	36	27.9115	36
hsa-miR-376b-4373196	36	36	36	36	36	36	36	36	36
hsa-miR-376c-4395233	31.2158	32.1771	27.476	27.3242	33.7654	30.6549	36	26.4504	35.5138
hsa-miR-377-4373025	36	36	34.6981	36	36	36	36	36	36
hsa-miR-379-4373349	33.3457	36	28.5356	27.7704	34.3577	35.9542	36	28.2882	36
hsa-miR-380-4373022	36	36	36	36	36	36	36	36	36
hsa-miR-381-4373020	35.8505	22.7336	23.1387	21.984	22.5335	21.4017	36	22.4462	22.0564
hsa-miR-382-4373019	36	36	28.996	27.5669	36	36	36	27.6069	36
hsa-miR-383-4373018	36	36	36	36	36	36	36	36	36
hsa-miR-384-4373017	36	36	36	36	36	36	36	36	36
hsa-miR-409-5p-4395442	36	36	36	36	36	36	36	36	36
hsa-miR-410-4378093	34.3056	36	30.1946	29.6029	36	36	36	28.5473	36
hsa-miR-411-4381013	32.5392	36	32.0256	31.2535	36	36	36	31.2838	36
hsa-miR-412-4373199	36	36	34.3016	36	36	34.6444	36	36	36
hsa-miR-422a-4395408	36	34.2418	36	36	32.6346	34.6378	34.9825	30.7238	33.497
hsa-miR-423-5p-4395451	32.2243	31.8087	29.8946	30.5458	31.5618	33.2505	30.6194	27.7984	35.2174
hsa-miR-424-4373201	35.2518	36	33.3877	33.8802	34.4426	36	36	31.9058	33.4447
hsa-miR-425-4380926	36	36	36	36	36	36	36	36	36
hsa-miR-429-4373203	30.1243	27.9212	34.3448	32.912	28.3022	28.5722	29.9516	24.5648	29.778
hsa-miR-431-4395173	36	36	36	36	36	36	36	36	36
hsa-miR-433-4373205	36	36	30.9181	30.1485	36	36	36	28.9763	36
hsa-miR-448-4373206	36	36	36	36	36	36	36	36	36
hsa-miR-449a-4373207	36	31.3148	36	34.8352	31.5998	36	36	36	36
hsa-miR-449b-4381011	36	29.7526	33.2302	33.3165	30.5719	32.5274	36	34.7281	36
hsa-miR-450a-4395414	36	36	32.7589	36	34.8334	36	36	32.0732	36
hsa-miR-450b-3p-4395319	36	36	36	36	36	36	36	36	36
hsa-miR-450b-5p-4395318	36	36	36	36	36	36	36	33.2145	36
hsa-miR-451-4373360	24.5292	25.9	27.5044	26.4651	28.1623	25.6927	28.018	28.9672	31.1405
hsa-miR-452-4395440	35.2119	30.0953	36	35.6863	29.2912	31.1013	30.5572	27.072	30.6415
hsa-miR-453-4395429	36	36	36	35.425	36	36	36	36	36
hsa-miR-454-4395434	29.3809	28.3054	27.951	27.7645	28.6693	28.7637	34.5212	24.3759	29.4957
hsa-miR-455-3p-4395355	36	28.7572	30.2669	28.857	30.5144	30.3511	30.7391	25.4645	31.1335
hsa-miR-455-5p-4378098	31.0927	27.9075	28.2834	27.9546	28.6027	29.3352	31.5221	25.7166	30.8886
hsa-miR-483-5p-4395449	30.9216	30.2888	30.255	31.1478	29.5458	29.936	36	28.9858	30.6607
hsa-miR-484-4381032	25.5511	24.3114	23.761	23.7373	23.8372	24.4023	25.8613	20.4162	25.4161
hsa-miR-485-3p-4378095	36	36	29.046	28.9499	36	36	36	28.8546	36
hsa-miR-485-5p-4373212	36	36	36	36	36	36	36	36	36
hsa-miR-486-3p-4395204	36	36	36	36	36	36	36	36	36
hsa-miR-486-5p-4378096	36	36	36	36	35.6995	33.06	36	34.5606	36
hsa-miR-487a-4378097	33.8904	36	36	33.7525	36	36	36	34.9833	36
hsa-miR-487b-4378102	36	36	29.7231	29.9949	34.8569	35.1546	36	29.2442	36
hsa-miR-488-4395468	36	36	36	32.9238	36	36	36	36	36
hsa-miR-489-4395469	33.8803	35.651	33.4417	31.9946	31.4725	34.633	36	29.4764	36
hsa-miR-490-3p-4373215	36	36	36	36	36	36	36	36	36
hsa-miR-491-3p-4395471	36	36	36	36	36	36	36	36	36
hsa-miR-491-5p-4381053	34.9269	32.8536	30.4616	30.0425	30.9782	31.0031	36	27.2705	36
hsa-miR-492-4373217	36	36	36	36	36	36	36	36	36
hsa-miR-493-4395475	36	36	31.4758	30.6924	36	36	36	31.0522	36
hsa-miR-494-4395476	28.1625	27.2447	27.9969	27.9308	27.4888	27.1739	29.3119	25.6423	27.0749
hsa-miR-495-4381078	31.8638	36	28.125	27.4972	32.5877	32.7191	36	26.9911	36
hsa-miR-496-4386771	36	36	36	36	36	36	36	36	36
hsa-miR-499-3p-4395538	36	36	36	36	36	36	36	36	36
hsa-miR-499-5p-4381047	36	36	36	36	36	36	36	36	36
hsa-miR-500-4395539	36	33.0569	36	33.384	32.5522	33.7565	36	29.414	36
hsa-miR-501-3p-4395546	36	36	36	36	36	36	36	36	36
hsa-miR-501-5p-4373226	36	36	36	36	36	36	36	36	36
hsa-miR-502-3p-4395194	36	33.1035	36	36	33.2207	35.4278	36	32.219	35.4583
hsa-miR-502-5p-4373227	36	36	36	36	34.4493	36	36	31.6238	36
hsa-miR-503-4373228	36	36	36	36	36	36	36	36	36
hsa-miR-504-4395195	36	36	36	36	36	36	36	36	36
hsa-miR-505-4395200	36	32.8789	35.2069	36	32.6971	34.8734	36	30.783	36
hsa-miR-506-4373231	36	36	36	36	36	36	36	36	36
hsa-miR-507-4373232	36	36	36	36	36	36	36	36	36
hsa-miR-508-3p-4373233	36	36	36	36	30.2964	35.7507	36	36	36
hsa-miR-508-5p-4395203	36	36	36	36	36	36	36	36	36
hsa-miR-509-3-5p-4395266	36	36	36	36	36	36	36	36	36
hsa-miR-509-5p-4395346	36	36	36	36	32.2073	36	36	36	36
hsa-miR-510-4395352	36	36	36	36	36	36	36	36	36
hsa-miR-511-4373236	36	33.8067	32.5515	33.7515	36	32	36	32.7725	36
hsa-miR-512-3p-4381034	36	36	36	36	34.2486	36	36	31.5281	36
hsa-miR-512-5p-4373238	36	36	36	36	36	36	36	36	36
hsa-miR-513-5p-4395201	36	36	36	36	36	36	36	36	36
hsa-miR-515-3p-4395480	36	36	36	34.982	36	36	33.731	34.8775	36
hsa-miR-515-5p-4373242	36	36	36	36	36	36	36	35.2468	36
hsa-miR-516a-5p-4395527	36	36	36	36	36	36	36	36	36
hsa-miR-516b-4395172	36	36	36	36	36	36	36	36	36
hsa-miR-517a-4395513	32.9705	35.0212	36	34.0086	35.5304	36	35.5281	32.4636	35.8873
hsa-miR-517b-4373244	36	36	36	36	36	36	36	36	36
hsa-miR-517c-4373264	36	36	32.098	33.837	31.9431	36	36	32.1599	36
hsa-miR-518a-3p-4395508	36	36	36	36	36	36	36	36	36
hsa-miR-518a-5p-4395507	36	36	36	36	36	36	36	36	36
hsa-miR-518b-4373246	36	36	36	36	36	36	36	36	36
hsa-miR-518c-4395512	36	36	36	36	36	36	36	36	36
hsa-miR-518d-3p-4373248	36	36	36	35.6368	36	36	36	36	36
hsa-miR-518d-5p-4395500	36	36	36	36	36	36	36	36	36
hsa-miR-518e-4395506	36	36	36	36	34.0144	36	36	33.4994	36
hsa-miR-518f-4395499	36	36	32.8343	36	36	36	36	33.1609	36
hsa-miR-519a-4395526	36	36	32.6418	35.9211	33.2523	36	36	32.5591	36
hsa-miR-519c-3p-4373251	36	36	36	36	36	36	36	36	36
hsa-miR-519d-4395514	36	36	36	36	36	36	36	36	36
hsa-miR-519e-4395481	36	36	36	36	36	36	36	36	36
hsa-miR-520a-3p-4373268	36	36	36	36	36	36	36	36	36
hsa-miR-520a-5p-4378085	36	36	36	36	36	36	36	36	36
hsa-miR-520b-4373252	33.412	36	36	36	36	36	36	36	35.569
hsa-miR-520d-5p-4395504	36	36	36	36	36	35.5336	34.3067	36	36
hsa-miR-520e-4373255	36	36	36	36	36	36	36	36	36
hsa-miR-520f-4373256	33.4517	36	36	36	36	36	36	36	36
hsa-miR-520g-4373257	36	36	36	36	36	36	36	36	36
hsa-miR-521-4373259	36	36	36	36	36	36	36	36	36
hsa-miR-522-4395524	36	36	36	36	36	36	36	35.4335	36
hsa-miR-523-4395497	36	33.4014	32.6333	32.4267	32.7194	33.0916	36	35.3927	32.7675
hsa-miR-524-5p-4395174	36	36	36	36	36	36	36	36	36
hsa-miR-525-3p-4395496	36	36	36	36	36	36	36	36	36
hsa-miR-525-5p-4378088	36	36	36	36	36	36	36	36	36
hsa-miR-526b-4395493	36	36	36	36	36	36	36	36	36
hsa-miR-532-3p-4395466	30.3958	28.9551	31.3553	30.9876	29.003	29.7142	30.2037	26.066	31.1571
hsa-miR-532-5p-4380928	31.3034	28.6151	29.7914	30.0405	28.2516	28.976	33.6537	25.5958	30.6095
hsa-miR-539-4378103	36	36	30.4286	28.3541	36	33.9501	36	27.974	36
hsa-miR-541-4395312	36	36	36	36	36	36	36	36	36
hsa-miR-542-3p-4378101	36	36	36	36	36	33.9521	36	34.9013	34.7689
hsa-miR-542-5p-4395351	36	36	36	36	36	36	36	36	36
hsa-miR-544-4395376	36	36	36	36	36	36	36	36	36
hsa-miR-545-4395378	33.5401	36	34.2558	36	32.9318	36	36	36	36
hsa-miR-548a-3p-4380948	36	36	36	36	36	36	36	36	33.6355
hsa-miR-548a-5p-4395523	36	36	36	36	36	36	36	36	36
hsa-miR-548b-3p-4380951	36	36	36	36	36	36	36	36	36
hsa-miR-548b-5p-4395519	33.3747	36	32.2237	32.891	34.4185	34.3425	36	32.949	36
hsa-miR-548c-3p-4380993	35.3496	36	36	36	36	36	33.9473	36	36
hsa-miR-548c-5p-4395540	36	33.4741	34.2715	32.7391	33.9175	34.555	36	32.4064	34.6363
hsa-miR-548d-3p-4381008	36	36	36	36	36	36	36	36	36
hsa-miR-548d-5p-4395348	36	34.9417	32.3989	33.1002	33.01	32.3333	36	32.323	36
hsa-miR-551b-4380945	36	36	34.6407	36	36	36	36	36	36
hsa-miR-556-3p-4395456	36	36	36	36	36	36	36	36	36
hsa-miR-556-5p-4395455	36	36	36	36	36	36	36	36	36
hsa-miR-561-4380938	36	36	36	36	36	36	36	36	36
hsa-miR-570-4395458	36	36	36	36	36	36	36	36	36
hsa-miR-574-3p-4395460	27.6851	27.9014	26.5416	26.879	26.2672	28.3822	28.2221	24.7564	28.2501
hsa-miR-576-3p-4395462	36	36	34.6923	33.9183	36	36	36	30.7759	33.2101
hsa-miR-576-5p-4395461	36	36	36	36	36	36	36	36	36
hsa-miR-579-4395509	36	34.6786	34.5614	36	33.5325	36	36	31.2939	36
hsa-miR-582-3p-4395510	36	36	36	36	36	36	36	36	36
hsa-miR-582-5p-4395175	36	36	36	36	36	36	36	36	36
hsa-miR-589-4395520	36	35.5036	36	36	36	36	36	33.1832	35.3707
hsa-miR-590-5p-4395176	31.7827	29.6797	30.0492	29.607	29.1186	31.2523	36	27.5519	31.3512
hsa-miR-597-4380960	31.4751	36	35.3795	29.9857	31.122	34.4524	36	30.0493	32.9459
hsa-miR-598-4395179	36	32.877	35.8067	32.5822	33.0306	33.6281	36	30.4645	34.2169
hsa-miR-615-3p-4386777	36	36	36	36	36	36	36	36	36
hsa-miR-615-5p-4395464	36	36	36	36	36	36	36	36	36
hsa-miR-616-4395525	36	36	36	36	36	36	36	36	36
hsa-miR-618-4380996	36	31.8562	32.1213	32.1626	31.665	29.7614	36	31.1016	30.5758
hsa-miR-624-4395541	36	36	36	36	36	36	36	36	36
hsa-miR-625-4395542	35.4283	35.1486	34.8806	36	36	35.4383	36	30.979	34.9971
hsa-miR-627-4380967	36	36	36	33.7313	36	36	36	36	36
hsa-miR-628-5p-4395544	34.7291	24.0829	25.0623	24.2978	23.5162	20.9157	36	30.6028	21.8032
hsa-miR-629-4395547	36	35.9189	34.4242	36	36	35.9427	36	32.9491	36
hsa-miR-636-4395199	31.0092	35.8506	31.8665	31.6193	30.7787	31.9231	36	30.1249	31.2405
hsa-miR-642-4380995	33.4441	30.5723	33.5217	33.8954	30.9871	31.9406	32.4343	29.1221	32.9514
hsa-miR-651-4381007	36	36	36	36	36	36	36	34.7074	36
hsa-miR-652-4395463	32.6371	32.6882	31.2023	31.2001	30.5258	31.5126	31.0023	25.3746	33.1372
hsa-miR-653-4395403	36	36	36	36	36	36	36	36	36
hsa-miR-654-3p-4395350	35.5226	36	31.8511	36	34.3268	36	36	32.1937	36
hsa-miR-654-5p-4381014	36	36	36	36	36	36	36	36	36
hsa-miR-655-4381015	36	36	36	36	36	36	36	36	36
hsa-miR-660-4380925	29.2332	28.5973	30.4269	29.5411	27.8929	29.1778	33.5592	26.9904	30.0836
hsa-miR-671-3p-4395433	32.5381	32.0455	31.392	30.6137	36	34.3062	31.2034	30.0174	35.8828
hsa-miR-672-4395438	36	36	36	36	35.1218	33.8301	36	36	36
hsa-miR-674-4395193	36	36	36	36	36	36	36	36	36
hsa-miR-708-4395452	29.02	27.9948	29.6486	29.4562	26.6404	28.378	33.138	26.9736	29.157
hsa-miR-744-4395435	29.6838	29.496	27.9872	28.8747	28.334	28.4841	27.1992	24.4348	29.7633
hsa-miR-758-4395180	36	30.388	29.4156	28.9964	30.6034	29.5694	36	28.8276	30.0335
hsa-miR-871-4395465	36	36	36	36	36	36	36	36	36
hsa-miR-872-4395375	36	36	36	36	36	36	36	36	36
hsa-miR-873-4395467	36	36	32.5444	32.3779	30.9989	36	36	32.7067	36
hsa-miR-874-4395379	36	36	36	36	36	36	36	36	36
hsa-miR-875-3p-4395315	36	36	36	36	36	36	36	36	36
hsa-miR-876-3p-4395336	36	36	36	36	36	36	36	34.6907	36
hsa-miR-876-5p-4395316	36	36	36	36	36	36	36	36	36
hsa-miR-885-3p-4395483	36	36	36	36	36	36	36	36	36
hsa-miR-885-5p-4395407	34.7253	36	31.3495	31.8039	33.629	36	36	32.5129	36
hsa-miR-886-3p-4395305	26.0858	29.0538	26.7928	26.8484	27.6418	25.9451	28.1927	25.6166	28.1004
hsa-miR-886-5p-4395304	25.7576	28.6443	25.7892	26.1553	27.0044	25.2327	26.8156	25.7424	27.3481
hsa-miR-887-4395485	36	36	36	36	36	36	36	36	36
hsa-miR-888-4395323	36	36	36	36	34.604	36	36	36	36
hsa-miR-889-4395313	36	36	31.2593	30.7763	36	36	36	32.1218	36
hsa-miR-890-4395320	36	36	36	36	36	36	36	36	36
hsa-miR-891a-4395302	36	36	36	36	36	36	36	36	36
hsa-miR-891b-4395321	36	36	36	36	36	36	36	36	36
hsa-miR-892a-4395306	36	36	36	36	36	36	36	36	36
hsa-miR-9-4373285	36	33.0079	33.2252	26.5886	31.4706	33.3043	36	26.3244	30.3302
hsa-miR-92a-4395169	25.8825	24.5413	25.3102	23.7632	25.0156	25.6215	24.9794	20.4284	25.9802
hsa-miR-93-4373302	28.4378	25.051	26.6993	25.0299	26.5419	25.9269	26.8647	20.7146	27.7626
hsa-miR-95-4373011	29.9936	28.722	32.0637	31.3131	27.9443	28.6486	32.8403	26.9979	30.7227
hsa-miR-96-4373372	33.7263	36	35.7563	36	34.7303	33.6923	36	31.7529	36
hsa-miR-98-4373009	36	36	36	30.355	36	36	36	27.9132	36
hsa-miR-99a-4373008	26.7371	26.9519	24.1816	23.2285	25.4553	26.1918	34.9768	23.6076	28.4638
hsa-miR-99b-4373007	32.0252	28.1424	27.3777	28.5437	27.9816	28.612	32.9999	23.6396	29.5699
hsa-let-7a*-4395418	36	36	36	36	36	36	36	36	36
hsa-let-7b*-4395515	36	36	36	36	36	36	36	36	36
hsa-let-7d*-4378108	36	36	36	36	36	36	36	36	36
hsa-let-7e*-4395518	36	36	35.8953	33.9111	36	36	36	33.9093	36
hsa-let-7f-1*-4395528	36	36	36	36	36	36	36	36	36
hsa-let-7f-2*-4395529	36	36	36	35.5963	36	36	36	36	36
hsa-let-7g*-4395229	36	36	36	36	36	36	36	34.425	36
hsa-let-7i*-4395283	36	36	33.469	32.4971	36	33.5146	36	36	36
hsa-miR-100*-4395253	36	36	31.7786	30.4709	36	36	36	36	36
hsa-miR-101*-4395254	36	36	36	36	36	36	36	36	36
hsa-miR-105*-4395279	36	36	36	36	36	36	36	36	36
hsa-miR-106a*-4395281	36	36	36	36	36	36	36	36	36
hsa-miR-106b*-4395491	36	36	36	36	36	36	36	29.711	36
hsa-miR-10a*-4395399	36	36	36	36	36	36	36	36	36
hsa-miR-10b*-4395426	36	32.2245	31.0411	29.5217	30.878	36	36	28.7263	34.7243
hsa-miR-122*-4395241	36	36	36	36	36	36	36	36	36
hsa-miR-124*-4395308	36	36	36	36	36	36	36	36	36
hsa-miR-125b-1*-4395489	36	36	30.3399	32.0057	36	34.2287	34.9813	35.7792	36
hsa-miR-125b-2*-4395269	36	36	36	36	36	36	36	36	36
hsa-miR-126*-4373269	30.7138	36	27.318	26.2465	36	29.7097	30.7429	35.7934	36
hsa-miR-130a*-4395242	36	36	36	36	36	33.1689	36	36	36
hsa-miR-130b*-4395225	36	36	31.6799	33.2744	36	36	35.7317	36	36
hsa-miR-132*-4395243	36	36	36	36	35.4159	36	36	36	36
hsa-miR-135a*-4395343	32.8321	30.7009	31.6498	31.153	31.2419	31.4557	33.2709	30.9743	31.3833
hsa-miR-135b*-4395270	36	32.831	32.3768	32.5688	33.769	36	35.2879	27.0504	36
hsa-miR-136*-4395211	35.0396	36	30.7702	30.3857	33.0403	36	34.0779	30.8554	36
hsa-miR-138-1*-4395273	31.4891	31.7533	30.0168	31.0873	31.486	30.895	30.9628	31.73	31.61
hsa-miR-138-2*-4395255	36	36	36	36	36	36	36	36	36
hsa-miR-141*-4395256	36	36	36	35.2198	36	36	32.7034	36	36
hsa-miR-143*-4395257	36	36	36	36	36	36	36	36	36
hsa-miR-144*-4395259	33.0706	35.3918	32.6734	30.0184	36	30.2701	31.7574	36	36
hsa-miR-145*-4395260	36	36	33.5763	31.0742	34.2337	33.3134	36	33.0968	33.3752
hsa-miR-146a*-4395274	36	36	36	36	36	36	36	36	36
hsa-miR-148a*-4395245	36	36	36	36	36	36	36	36	36
hsa-miR-148b*-4395271	36	36	33.2498	31.5496	36	34.0466	36	34.5929	36
hsa-miR-149*-4395275	36	36	36	36	36	36	36	36	36
hsa-miR-151-3p-4395365	30.5912	29.6304	27.2835	26.9346	36	28.8217	29.5492	25.7257	25.3051
hsa-miR-154*-4378065	36	36	32.6502	32.6195	36	36	36	33.891	36
hsa-miR-155*-4395398	36	36	36	36	36	36	36	36	36
hsa-miR-15a*-4395530	36	33.3489	32.9111	30.242	34.2754	36	36	30.4654	35.8262
hsa-miR-15b*-4395284	36	36	36	36	36	36	36	36	36
hsa-miR-16-1*-4395531	36	32.2772	31.7847	30.9175	36	36	36	31.649	36
hsa-miR-16-2*-4395282	36	36	36	36	36	36	36	36	36
hsa-miR-17*-4395532	36	34.7039	32.0022	33.8299	34.9453	35.3276	36	30.1094	36
hsa-miR-181a*-4373086	35.5874	36	33.467	31.3922	33.3346	36	36	29.7003	36
hsa-miR-181a-2*-4395428	36	33.994	34.2493	31.7396	32.784	32.7002	33.3528	28.1478	35.1017
hsa-miR-181c*-4395444	36	36	36	36	36	36	36	36	36
hsa-miR-182*-4378066	36	36	36	36	36	36	36	36	36
hsa-miR-183*-4395381	36	36	36	36	34.1685	34.4421	30.6874	29.3351	36
hsa-miR-185*-4395215	36	36	36	36	36	36	36	36	36
hsa-miR-186*-4395216	36	36	36	36	36	36	36	36	36
hsa-miR-188-5p-4395431	32.9163	26.1885	32.396	32.4044	25.782	33.5292	33.1577	27.2688	25.4309
hsa-miR-18a*-4395534	36	36	35.5984	33.3394	36	36	34.3631	36	36
hsa-miR-18b*-4395421	36	36	36	36	36	36	36	36	36
hsa-miR-190b-4395374	33.9697	36	36	31.6397	36	33.1146	35.8346	36	36
hsa-miR-192*-4395383	36	36	36	36	36	36	36	35.4519	36
hsa-miR-193b*-4395477	36	36	36	36	36	36	34.1774	32.0315	36
hsa-miR-194*-4395490	36	36	36	36	36	36	36	36	36
hsa-miR-195*-4395218	36	36	36	36	36	36	36	36	36
hsa-miR-19a*-4395535	36	36	36	36	36	36	36	35.1172	36
hsa-miR-19b-1*-4395536	32.5857	36	31.8097	31.7372	36	32.5672	36	33.4993	36
hsa-miR-19b-2*-4395537	36	36	36	36	36	36	36	36	36
hsa-miR-200a*-4373273	35.6626	30.8035	36	36	31.4885	33.2071	32.2643	28.0952	31.0059
hsa-miR-200b*-4395385	36	29.4114	36	36	29.4864	36	30.1843	25.927	34.6289
hsa-miR-200c*-4395397	36	36	36	36	36	36	36	36	36
hsa-miR-202*-4395473	36	36	36	36	36	36	36	36	36
hsa-miR-206-4373092	36	33.0288	36	32.5327	32.2024	36	36	32.3889	36
hsa-miR-20a*-4395548	33.815	34.1419	31.6697	31.827	36	34.3072	36	29.6798	36
hsa-miR-20b*-4395422	36	36	36	36	36	36	36	36	36
hsa-miR-21*-4395549	33.661	28.988	25.8947	25.9798	29.093	29.2906	26.8848	26.2395	30.991
hsa-miR-214*-4395404	33.6779	35.3795	27.9879	27.4368	36	33.9501	36	31.8324	35.6913
hsa-miR-218-2*-4395405	36	35.212	36	36	36	36	36	36	36
hsa-miR-22*-4395412	35.6823	31.4363	31.4397	30.6091	31.8647	33.152	35.2254	31.7638	33.1611
hsa-miR-221*-4395207	36	36	36	36	36	36	36	36	36
hsa-miR-222*-4395208	34.4522	30.3659	31.2524	29.8949	29.4369	29.625	32.5849	28.2039	31.5592
hsa-miR-223*-4395209	36	32.9089	31.1042	31.0525	34.1722	34.5411	33.6994	29.4444	32.9445
hsa-miR-23a*-4395550	36	36	36	36	36	35.0017	36	35.8467	36
hsa-miR-23b*-4395237	36	36	36	36	36	36	36	36	36
hsa-miR-24-1*-4395551	36	36	36	36	36	36	36	36	36
hsa-miR-25*-4395553	36	36	36	36	36	36	36	32.3873	36
hsa-miR-26a-1*-4395554	36	36	36	35.6544	36	36	36	36	36
hsa-miR-26a-2*-4395226	36	36	31.0661	34.9625	33.9867	36	36	33.8624	36
hsa-miR-26b*-4395555	35.5515	36	32.2264	32.3189	36	36	34.4602	35.8203	36
hsa-miR-27a*-4395556	34.4517	30.7898	30.4517	31.0643	31.3084	33.1484	30.4262	27.6484	33.219
hsa-miR-27b*-4395285	36	32.9532	31.4558	32.3413	33.5109	36	34.0424	28.6662	36
hsa-miR-29a*-4395558	36	34.6419	34.3182	31.8566	36	36	36	34.1771	36
hsa-miR-29b-1*-4395276	36	36	36	36	36	36	36	36	36
hsa-miR-29b-2*-4395277	36	36	34.5199	34.8984	35.3045	36	34.7635	36	36
hsa-miR-29c*-4381131	35.12	36	31.8632	31.4566	36	32.1282	35.0227	36	36
hsa-miR-302a*-4395492	36	36	36	36	36	36	36	36	36
hsa-miR-302b*-4395230	36	36	36	36	36	36	36	36	36
hsa-miR-302c*-4373277	36	36	36	36	36	36	36	36	36
hsa-miR-302d*-4395231	36	36	36	36	36	36	36	36	36
hsa-miR-302d-4373063	36	36	36	36	36	36	36	36	36
hsa-miR-30a*-4373062	30.1798	28.2869	27.7011	27.2953	29.5634	29.5762	32.9605	25.3284	30.4626
hsa-miR-30a-4373061	28.6475	26.2371	25.9731	25.8599	25.6075	27.2359	27.2168	22.4809	27.1735
hsa-miR-30b*-4395240	36	36	36	36	36	36	36	36	36
hsa-miR-30c-1*-4395219	36	36	36	36	36	36	36	36	36
hsa-miR-30c-2*-4395221	36	36	36	36	36	36	36	36	36
hsa-miR-30d*-4395416	36	31.8446	31.4191	31.4464	34.8679	36	36	29.5297	36
hsa-miR-30d-4373059	33.0819	29.3168	28.525	28.6853	28.8626	30.8625	29.9039	25.2513	30.7219
hsa-miR-30e*-4373057	30.807	27.0012	26.7976	25.9178	27.6352	28.9633	29.7642	24.6993	28.2484
hsa-miR-30e-4395334	32.7522	30.883	30.2838	29.4548	30.8236	31.7331	31.2617	26.7434	34.022
hsa-miR-32*-4395222	36	36	36	36	36	36	36	36	36
hsa-miR-335*-4395296	36	36	36	36	36	36	36	30.9604	36
hsa-miR-337-3p-4395268	36	36	36	34.2079	36	36	36	36	36
hsa-miR-33a*-4395247	36	33.1663	36	36	34.6009	36	36	32.7368	36
hsa-miR-340*-4395370	35.2636	31.7261	31.3161	32.5913	30.0361	33.3108	33.6478	29.1076	32.9909
hsa-miR-34a*-4395427	34.5837	29.5184	29.3516	29.4359	30.2779	30.9971	31.5866	27.6113	30.7678
hsa-miR-34b*-4373037	31.982	31.5931	34.5297	32.4632	30.9219	34.9709	36	34.7491	36
hsa-miR-361-3p-4395227	36	36	36	36	36	36	36	36	36
hsa-miR-363*-4380917	36	36	36	36	36	36	36	36	36
hsa-miR-367*-4395232	36	36	36	36	36	36	36	36	36
hsa-miR-373*-4373279	36	36	36	36	36	36	36	36	36
hsa-miR-374a*-4395236	36	36	36	36	36	36	36	36	36
hsa-miR-374b*-4395502	36	36	36	36	36	36	36	36	36
hsa-miR-376a*-4395238	36	36	36	33.3134	36	36	36	36	36
hsa-miR-377*-4395239	36	36	36	33.3364	36	36	36	36	36
hsa-miR-378*-4373024	34.361	29.6333	34.2675	36	36	34.5471	36	30.7554	36
hsa-miR-378-4395354	30.8437	15.1186	30.6843	30.3839	16.6205	30.1063	30.3865	16.7341	15.3888
hsa-miR-379*-4395244	36	36	34.715	35.9048	36	36	36	36	36
hsa-miR-380*-4373021	34.7309	34.8095	30.5346	30.5296	34.577	34.5162	33.2988	32.0959	34.3001
hsa-miR-409-3p-4395443	35.7993	35.0378	24.3837	24.3465	33.0959	35.1547	36	24.6852	35.7031
hsa-miR-411*-4395349	36	36	31.8934	36	36	36	36	35.9517	36
hsa-miR-424*-4395420	36	36	36	36	36	36	36	33.4398	36
hsa-miR-425*-4395413	36	36	33.3339	32.0635	36	36	32.882	31.9987	36
hsa-miR-431*-4395423	36	36	36	36	36	36	36	36	36
hsa-miR-432*-4378076	36	36	36	36	36	36	36	36	36
hsa-miR-432-4373280	36	36	27.0371	27.4116	36	36	36	30.704	36
hsa-miR-452*-4395441	36	36	36	36	36	36	36	36	36
hsa-miR-454*-4395185	36	36	35.5787	36	36	36	35.623	36	36
hsa-miR-488*-4373213	36	36	36	36	36	36	36	36	36
hsa-miR-493*-4373218	36	36	36	36	36	36	36	36	36
hsa-miR-497*-4395479	36	36	36	36	36	36	36	36	36
hsa-miR-497-4373222	35.7759	36	33.1506	33.0288	32.9577	36	36	29.8013	35.2408
hsa-miR-498-4373223	36	36	36	36	36	36	36	36	36
hsa-miR-500*-4373225	36	36	36	36	36	36	36	36	36
hsa-miR-505*-4395198	34.7885	36	33.4806	36	36	35.2618	33.1793	31.3689	36
hsa-miR-509-3p-4395347	36	36	33.4966	33.4957	36	36	36	36	36
hsa-miR-513-3p-4395202	36	13.5864	36	36	13.6902	36	36	13.9328	12.6329
hsa-miR-516a-3p-4373183	36	33.433	31.1472	29.9126	32.4684	36	36	32.4939	36
hsa-miR-517*-4378078	36	36	36	36	36	36	36	36	36
hsa-miR-518c*-4378082	36	36	36	36	36	36	36	36	36
hsa-miR-518e*-4395482	36	36	36	36	36	36	36	36	36
hsa-miR-518f*-4395498	36	36	36	36	36	36	36	36	36
hsa-miR-519b-3p-4395495	36	36	34.975	36	36	36	36	36	36
hsa-miR-519e*-4378084	36	36	36	36	36	36	36	36	36
hsa-miR-520c-3p-4395511	36	36	33.2324	32.0463	36	35.6545	36	36	36
hsa-miR-520h-4373258	36	36	36	36	36	36	36	36	36
hsa-miR-524-3p-4378087	36	36	36	36	36	36	36	36	36
hsa-miR-526b*-4395494	34.5657	33.009	36	36	36	36	36	34.1952	36
hsa-miR-541*-4395311	36	36	36	36	36	36	36	36	36
hsa-miR-543-4395487	36	36	29.2295	29.6728	36	36	36	30.4679	36
hsa-miR-545*-4395377	36	36	36	36	36	36	36	36	36
hsa-miR-549-4380921	36	36	36	36	36	36	36	36	36
hsa-miR-550*-4380954	36	36	36	35.0856	36	36	36	36	36
hsa-miR-550-4395521	36	35.9906	36	36	36	36	36	36	36
hsa-miR-551a-4380929	36	36	36	36	36	36	36	36	36
hsa-miR-551b*-4395457	36	36	36	36	36	36	36	36	36
hsa-miR-552-4380930	36	36	36	36	36	36	36	36	36
hsa-miR-553-4380931	36	36	36	36	36	36	36	36	36
hsa-miR-554-4380932	36	36	36	36	36	36	36	36	36
hsa-miR-555-4380933	36	36	36	36	36	36	36	36	36
hsa-miR-557-4380935	36	36	36	36	36	36	36	36	36
hsa-miR-558-4380936	36	36	36	36	36	36	36	36	36
hsa-miR-559-4380937	36	36	36	36	36	36	36	36	36
hsa-miR-562-4380939	36	36	36	36	36	36	36	36	36
hsa-miR-563-4380940	36	36	36	36	36	36	36	36	36
hsa-miR-564-4380941	36	36	36	32.4837	33.3724	36	36	33.9655	35.7008
hsa-miR-565-4380942	36	36	36	36	36	36	35.8755	32.7472	36
hsa-miR-566-4380943	36	36	36	36	36	36	36	36	36
hsa-miR-567-4380944	36	36	36	36	36	36	36	36	36
hsa-miR-569-4380946	36	36	36	36	36	36	36	36	36
hsa-miR-571-4381016	33.6045	36	34.6064	35.6824	36	34.9892	36	36	36
hsa-miR-572-4381017	36	32.7427	31.2893	29.7243	31.4823	32.4869	35.8361	31.6191	32.7684
hsa-miR-573-4381018	36	36	34.9912	36	36	36	36	36	36
hsa-miR-575-4381020	36	36	36	36	36	36	36	36	36
hsa-miR-578-4381022	36	36	36	36	36	36	36	36	36
hsa-miR-580-4381024	36	36	36	36	36	36	36	36	36
hsa-miR-581-4386744	36	36	36	36	36	36	36	36	36
hsa-miR-583-4381025	36	36	36	36	36	36	36	36	36
hsa-miR-584-4381026	36	36	33.6859	36	36	36	36	36	36
hsa-miR-585-4381027	36	36	36	36	36	36	36	36	36
hsa-miR-586-4380949	36	36	36	36	36	36	36	36	36
hsa-miR-587-4380950	36	36	36	36	36	36	36	36	36
hsa-miR-588-4380952	36	36	36	36	36	36	36	36	36
hsa-miR-589*-4380953	36	35.7895	36	33.9032	36	36	36	31.1064	36
hsa-miR-591-4380955	36	36	36	35.2986	36	36	36	36	36
hsa-miR-592-4380956	36	36	33.8603	33.608	36	36	36	36	36
hsa-miR-593*-4380957	36	36	36	36	36	36	36	36	36
hsa-miR-593-4395522	36	36	36	36	36	36	36	36	36
hsa-miR-595-4395178	36	36	36	36	36	36	36	36	36
hsa-miR-596-4380959	36	36	36	36	36	36	36	36	36
hsa-miR-599-4380962	36	36	36	36	36	36	36	36	36
hsa-miR-600-4380963	36	36	36	36	36	36	36	36	36
hsa-miR-601-4380965	36	27.4943	31.8635	32.2091	26.9172	32.7318	31.9553	25.7287	26.332
hsa-miR-603-4380972	36	36	36	36	36	36	36	36	36
hsa-miR-604-4380973	36	36	34.8221	34.9798	36	32.8308	34.8221	34.9375	36
hsa-miR-605-4386742	36	36	31.1179	33.2564	33.1616	36	36	32.8097	36
hsa-miR-606-4380974	36	36	36	36	36	36	36	36	36
hsa-miR-607-4380975	36	36	36	36	36	36	36	36	36
hsa-miR-608-4380976	36	36	36	36	36	36	36	36	36
hsa-miR-609-4380978	36	36	36	36	36	36	36	36	36
hsa-miR-610-4380980	36	35.7054	36	36	36	35.4815	35.6269	36	36
hsa-miR-612-4380983	36	36	36	36	36	36	36	36	36
hsa-miR-613-4380989	36	36	36	36	36	36	36	36	36
hsa-miR-614-4380990	36	36	36	36	36	36	36	36	36
hsa-miR-616*-4380992	36	36	36	36	36	36	36	36	36
hsa-miR-617-4380994	36	36	36	34.2689	36	36	36	36	36
hsa-miR-619-4380998	36	36	36	36	36	36	36	36	36
hsa-miR-621-4381001	36	36	36	36	36	36	36	36	36
hsa-miR-622-4380961	36	36	36	36	36	36	36	36	36
hsa-miR-623-4386740	36	36	36	36	36	36	36	36	36
hsa-miR-624*-4380964	36	36	36	36	36	36	36	36	36
hsa-miR-625*-4395543	32.258	27.2594	27.617	26.9454	26.1831	30.5998	30.5597	25.4235	27.5072
hsa-miR-626-4380966	36	36	36	36	36	36	36	36	36
hsa-miR-628-3p-4395545	36	36	36	36	36	36	36	32.717	36
hsa-miR-629*-4380969	34.0171	36	32.4626	32.0327	34.1288	34.6354	32.0388	29.7601	34.078
hsa-miR-630-4380970	34.6256	36	33.3255	34.9962	35.3026	33.3911	35.0646	33.995	36
hsa-miR-631-4380971	36	36	36	36	36	36	36	36	36
hsa-miR-632-4380977	36	34.652	36	36	36	36	36	33.8404	36
hsa-miR-633-4380979	36	36	36	36	36	36	36	36	36
hsa-miR-634-4380981	36	36	36	36	36	36	36	36	36
hsa-miR-635-4380982	36	36	34.6143	36	36	36	36	34.3205	36
hsa-miR-637-4380985	36	36	36	36	36	36	36	36	36
hsa-miR-638-4380986	36	35.1275	29.6132	29.5085	34.1419	36	32.6172	32.5698	33.881
hsa-miR-639-4380987	35.3057	36	34.2325	32.1341	36	36	36	36	36
hsa-miR-640-4386743	36	36	36	36	36	36	36	36	36
hsa-miR-641-4380988	36	36	36	36	36	36	36	36	36
hsa-miR-643-4380997	36	36	36	34.7755	36	36	36	36	36
hsa-miR-644-4380999	35.0889	36	36	36	36	36	36	36	36
hsa-miR-645-4381000	33.9967	35.571	33.8045	34.596	36	33.9877	34.1332	36	36
hsa-miR-646-4381002	36	36	36	36	36	36	36	36	36
hsa-miR-647-4381003	36	36	36	36	36	36	36	36	36
hsa-miR-648-4381004	36	36	36	36	36	36	36	36	36
hsa-miR-649-4381005	36	36	35.0501	35.7573	36	36	36	36	36
hsa-miR-650-4381006	31.4925	30.4483	36	34.3227	29.2621	27.1547	32.5718	27.2258	27.5711
hsa-miR-656-4380920	36	36	33.4754	33.3616	36	36	36	36	36
hsa-miR-657-4380922	36	36	36	36	36	36	36	36	36
hsa-miR-658-4380923	36	36	36	36	36	36	36	36	36
hsa-miR-659-4380924	36	36	36	36	36	36	36	36	36
hsa-miR-661-4381009	36	36	31.5866	36	36	36	36	36	36
hsa-miR-662-4381010	36	36	36	36	36	36	36	36	36
hsa-miR-668-4395181	36	36	36	36	36	36	36	36	36
hsa-miR-675-4395192	36	36	36	36	36	36	36	36	36
hsa-miR-7-1*-4381118	36	36	30.2031	30.7043	36	36	36	34.5293	36
hsa-miR-7-2*-4395425	36	36	36	36	36	36	36	36	36
hsa-miR-7-4378130	36	33.626	34.8455	35.3294	32.8126	35.8684	36	33.7318	35.733
hsa-miR-708*-4395453	36	36	36	36	36	36	36	36	36
hsa-miR-744*-4395436	36	36	32.4774	35.7272	36	36	36	34.407	36
hsa-miR-760-4395439	31.8606	36	30.9835	31.7434	36	32.4499	31.815	36	36
hsa-miR-766-4395177	35.2564	32.4178	36	36	36	36	31.0755	29.2563	36
hsa-miR-767-3p-4395184	36	36	36	36	36	36	36	36	36
hsa-miR-767-5p-4395182	36	36	36	36	36	36	36	30.5423	36
hsa-miR-768-3p-4395188	36	33.4169	32.4475	31.8219	31.3521	35.4726	32.4613	28.9887	34.7079
hsa-miR-769-3p-4395190	36	36	36	36	36	36	36	34.1892	36
hsa-miR-769-5p-4395186	34.2481	30.263	29.0628	29.1021	30.9696	32.6658	31.2615	26.3523	35.3495
hsa-miR-770-5p-4395189	36	36	32.5361	31.5254	36	36	36	36	36
hsa-miR-801-4395183	36	36	35.4516	34.3049	32.4217	32.752	35.626	29.1141	33.9985
hsa-miR-875-5p-4395314	36	36	34.3682	34.9787	36	33.4101	36	36	36
hsa-miR-877-4395402	36	35.9445	35.0355	36	35.1228	34.3928	36	34.7873	35.6216
hsa-miR-888*-4395324	36	36	36	36	36	36	36	36	36
hsa-miR-892b-4395325	36	36	36	36	36	36	36	36	36
hsa-miR-9*-4395342	36	33.7047	29.9695	29.9514	33.6608	32.161	33.2913	28.0162	34.2664
hsa-miR-920-4395261	36	36	36	36	36	36	36	36	36
hsa-miR-921-4395262	36	36	36	36	36	36	36	36	36
hsa-miR-922-4395263	36	36	34.7641	36	36	36	36	36	36
hsa-miR-923-4395264	33.9121	31.6246	29.6585	30.4977	27.737	28.9968	31.7854	31.2397	29.95
hsa-miR-924-4395265	36	36	36	36	36	36	36	36	36
hsa-miR-92a-1*-4395248	36	34.9026	36	34.0729	36	34.135	36	30.5039	36
hsa-miR-92a-2*-4395249	36	36	36	36	36	36	36	36	36
hsa-miR-92b*-4395454	36	36	36	36	36	36	36	36	36
hsa-miR-93*-4395250	36	32.5762	29.0239	28.966	32.8139	32.9645	30.5584	27.0909	34.161
hsa-miR-933-4395287	36	36	36	36	36	36	36	36	36
hsa-miR-934-4395288	36	36	36	36	36	36	36	36	36
hsa-miR-935-4395289	36	36	36	36	36	36	36	36	36
hsa-miR-936-4395290	36	36	36	36	36	36	36	36	36
hsa-miR-937-4395291	36	36	36	36	36	36	36	36	36
hsa-miR-938-4395292	36	36	36	36	36	36	34.8016	36	36
hsa-miR-939-4395293	36	36	36	36	36	36	36	36	36
hsa-miR-941-4395294	36	36	36	36	36	36	36	36	36
hsa-miR-942-4395298	36	36	35.7032	36	34.2534	36	36	30.6997	36
hsa-miR-943-4395299	36	36	36	36	36	36	36	36	36
hsa-miR-944-4395300	34.3069	30.1297	32.7877	31.8881	30.1537	32.9908	32.2728	28.169	31.7091
hsa-miR-96*-4395251	36	36	36	36	36	36	36	36	36
hsa-miR-99a*-4395252	33.3285	31.5352	29.8815	28.6585	30.1362	33.2096	34.0486	29.0251	36
hsa-miR-99b*-4395307	32.411	35.4061	30.5786	30.9077	36	36	34.3291	28.972	36
MammU6-4395470	23.38	20.531	19.9534	21.0255	22.9765	22.5771	19.6064	16.223	24.2184
RNU24-4373379	36	36	36	35.9831	36	36	36	35.4934	36
RNU43-4373375	36	36	36	36	36	36	36	36	36
RNU44-4373384	29.8366	26.5132	23.4911	24.4731	26.6673	27.8221	24.1848	21.9986	36
RNU48-4373383	25.4473	23.1208	21.0045	21.8964	24.8969	24.2992	21.6212	18.1993	27.7998
RNU6B-4373381	36	36	34.6114	35.4194	36	36	32.8861	29.9284	36
