# Supplementary material for: Expression of miR-296-5p as predictive marker for radiotherapy resistance in early-stage laryngeal carcinoma
Source: J Transl Med. 2015 Aug 12;13:262. doi: 10.1186/s12967-015-0621-y (PMC4533949; doi:10.1186/s12967-015-0621-y)
Supplement: Additional file 2: — Table S2. Expression data of the four selected microRNAs in the 34 LSCC samples included in the study. Ct values represent the average of three technical replicates. [file 12967_2015_621_MOESM2_ESM.xlsx]

## Sheet: Sheet1
Supplementary Table S2 – Expression data of the four selected microRNAs in the 34 LSCC samples included in the study. Ct values represent the average of three technical replicates.
		U6	miR-183*	DCT	2ˆ-DCT	miR-183*	miR-452	DCT	2ˆ-DCT	miR-452	miR-296	DCT	2ˆ-DCT	miR-296	mir-200c	DCT	2ˆ-DCT	miR-200c
Cases	Recurrence			183-U6	183-U6	Expression level		452-U6	452-U6	Expression level		296-U6	(296-U6)	Expression level		200c-U6	200c-U6	Expression level
1	yes	26.76	31.15	4.39	0.0478	high	30.9	4.14	0.0568	high	32.14	5.38	0.02403	high	37.1619	10.4	0.000741	down
2	yes	31.33	33.71	2.37	0.1929	high	40	8.67	0.0025	down	33.33	2	0.25049	high	33.4065	2.07	0.237731	high
3	yes	27.38	40	12.62	0.0002	down	31.96	4.58	0.0417	high	32.42	5.05	0.03023	high	31.8015	4.42	0.046556	down
4	yes	28.58	31.13	2.56	0.1697	high	28.59	0.02	0.9893	high	30.28	1.71	0.30591	high	30.6393	2.06	0.239222	high
5	yes	32.42	34.28	1.87	0.2743	high	40	7.58	0.0052	down	35.13	2.72	0.15201	high	35.4121	3	0.125281	high
6	yes	28.2	32.65	4.45	0.0458	high	31.05	2.86	0.1381	high	31.72	3.52	0.0869	high	27.6921	-0.51	1.41919	high
7	yes	26.25	30.88	4.63	0.0404	high	32.62	6.37	0.0121	high	34.19	7.94	0.00407	down	29.9667	3.71	0.076248	down
8	yes	31.64	38.02	6.37	0.0121	high	40	8.36	0.0031	down	34.38	2.74	0.14971	high	31.7033	0.06	0.959919	high
9	yes	30.41	32.71	2.3	0.203	high	33.54	3.13	0.114	high	32.66	2.25	0.21083	high	34.5261	4.12	0.057643	down
10	yes	29.71	35.67	5.96	0.016	down	29.7	-0.01	1.0041	high	31.2	1.49	0.35659	high	31.3337	1.62	0.324598	high
11	yes	24.74	37.79	13.05	0.0001	down	29.19	4.45	0.0458	high	30.96	6.22	0.0134	down		missing	missing	missing
12	yes	29.23	32.8	3.57	0.0843	high	40	10.77	0.0006	down	34.1	4.87	0.03412	high	29.7132	0.48	0.716174	high
13	yes	20.58	30.78	10.2	0.0009	down	26.38	5.81	0.0179	high	29.85	9.28	0.00161	down	27.893	7.32	0.00628	down
14	yes	25.53	30.31	4.78	0.0363	high	32.83	7.3	0.0064	down	31.08	5.54	0.02142	high	24.1126	-1.42	2.67226	high
15	yes	25.86	30.42	4.56	0.0424	high	31.81	5.95	0.0162	high	29.19	3.32	0.10006	high	23.4408	-2.42	5.36613	high
16	yes	26.78	29.77	2.99	0.1258	high	33.3	6.52	0.0109	down	31.53	4.75	0.03715	high	36.9287	10.15	0.00088	down
17	yes	20.46	32.42	11.95	0.0003	down	30.61	10.15	0.0009	down	34.73	14.27	5e-05	down	31.9038	11.44	0.00036	down
18	yes	17.83	28.58	10.76	0.0006	down	26.54	8.71	0.0024	down	26.05	8.22	0.00335	down	36.4216	18.6	3e-06	down
19	yes	20.61	31.02	10.41	0.0007	down	30.16	9.55	0.0013	down	32.18	11.57	0.00033	down	27.8693	7.26	0.00653	down
20	yes	31.93	34.28	2.35	0.1966	high	35.37	3.44	0.0922	high	31.85	-0.09	1.06141	high	32.6372	-3.47	11.046	high
21	no	31.44	40	8.56	0.0027	down	40	8.56	0.0027	down	36.26	4.82	0.0354	high	39.7364	1.19	0.437235	down
22	no	29.64	39.87	10.22	0.0008	down	34.69	5.05	0.0301	high	36.12	6.48	0.01121	down	38.7473	10.1	0.000914	down
23	no	21.69	31.92	10.23	0.0008	down	40	18.31	3.0837e-06	down	33.65	11.95	0.00025	down	29.7444	17.05	7e-06	down
24	no	23.55	31.85	8.3	0.0032	down	31.78	8.23	0.0033	down	38.49	14.94	3e-05	down	37.1889	6.19	0.013679	down
25	no	30.43	36.56	6.13	0.0143	down	33.87	3.44	0.0923	high	35.41	4.97	0.0318	high	30.8689	6.76	0.009242	down
26	no	24.69	30.13	5.44	0.023	high	33.63	8.94	0.002	down	32.19	7.5	0.00553	down	28.4695	6.18	0.013836	high
27	no	31.82	36.58	4.76	0.037	high	34.44	2.62	0.1631	high	37.64	5.82	0.0177	high	25.9657	-5.86	57.9771	high
28	no	28.06	34.98	6.92	0.0083	down	40	11.94	0.0003	down	35.19	7.13	0.00715	down	24.1487	-3.92	15.086	high
29	no	27.39	31.05	3.66	0.0794	high	31.34	3.95	0.0648	high	35.49	8.1	0.00364	down	27.4033	0.01	0.99115	high
30	no	28.21	33.5	5.28	0.0257	high	32.95	4.74	0.0374	high	34.62	6.41	0.01174	down	25.3984	-2.81	7.03048	high
31	no	27.97	33.65	5.68	0.0195	high	35.48	7.51	0.0055	down	38.27	10.3	0.00079	down	28.0955	0.13	0.916266	high
32	no	22.78	32.71	9.93	0.001	down	28.03	5.25	0.0262	high	35.94	13.16	0.00011	down	26.0757	3.3	0.101686	high
33	no	19.53	31.02	11.48	0.0004	down	30.68	11.15	0.0004	down	32.41	12.88	0.00013	down	23.4705	3.94	0.065276	down
34	no	21.68	32.52	10.83	0.0006	down	31.87	10.18	0.0009	down	34.32	12.64	0.00016	down	27.1653	5.48	0.022391	down
Threshold expression 296			0.015549
Threshold expression 200c			0.101686
Threshold expression 452			0.011502
Threshold expression 183*			0.017763
